# Supplementary material for: There and back again, an organic carbon journey: mapping pathways and loops
Source: Copernicus journal article supplement (doi:10.5194/os-2021-75), 2021-08-19
Supplement: Supplementary file 1 [file os-2021-75-supplement.zip]

# Publication bibliography

- Alfaro, Andrea C. (2006): Evidence of cannibalism and benthic-pelagic coupling within the life cycle of the mussel, *Perna canaliculus*. In *Journal of Experimental Marine Biology and Ecology* 329 (2), pp. 206–217. DOI: 10.1016/j.jembe.2005.09.002.
- Allan, J. David (1976): Life History Patterns in Zooplankton. In *The American Naturalist* 110 (971), pp. 165–180. DOI: 10.1086/283056.
- Allredge, A. (2001): Particle Aggregation Dynamics. In John H. Steele, S. A. Thorpe, Karl K. Turekian (Eds.): *Encyclopedia of ocean sciences*. [Amsterdam]: Elsevier (Gale virtual reference library), pp. 2090–2097.
- Azam, F. (1984): The ecological and biogeochemical roles of the bacterioplankton in coastal marine ecosystems. In *Marine geology and oceanography of Arabian Sea and coastal Pakistan*. Van Nostrand Reinhold Co., New York.
- Azam, F.; Fenchel, T.; Field, J. G.; Gray, J. S.; La Meyer-Reil; Thingstad, F. (1983): The Ecological Role of Water-Column Microbes in the Sea. In *Marine Ecology Progress Series* 10, pp. 257–263. DOI: 10.3354/meps010257.
- Azam, Farooq; Malfatti, Francesca (2007): Microbial structuring of marine ecosystems. In *Nat Rev Microbiol* 5 (10), pp. 782–791. DOI: 10.1038/nrmicro1747.
- Barber, Andrew; Brandes, Jay; Leri, Alessandra; Lalonde, Karine; Balind, Kathryn; Wirick, Sue et al. (2017): Preservation of organic matter in marine sediments by inner-sphere interactions with reactive iron. In *Sci Rep* 7 (1), p. 366. DOI: 10.1038/s41598-017-00494-0.
- Barnes, R. O.; Goldberg, E. D. (1976): Methane production and consumption in anoxic marine sediments. In *Geol* 4 (5), p. 297. DOI: 10.1130/0091-7613(1976)4<297:MPACIA>2.0.CO;2.
- Bates, Michael L.; Bengtson Nash, Susan M.; Hawker, Darryl W.; Norbury, John; Stark, Jonny S.; Cropp, Roger A. (2015): Construction of a trophically complex near-shore Antarctic food web model using the Conservative Normal framework with structural coexistence. In *Journal of Marine Systems* 145, pp. 1–14. DOI: 10.1016/j.jmarsys.2014.12.002.
- Benner, Ronald; Amon, Rainer M. W. (2015): The size-reactivity continuum of major bioelements in the ocean. In *Annual review of marine science* 7, pp. 185–205. DOI: 10.1146/annurev-marine-010213-135126.
- Benner, Ronald; Biddanda, Bopaiah (1998): Photochemical transformations of surface and deep marine dissolved organic matter: Effects on bacterial growth. In *Limnol Oceanogr* 43 (6), pp. 1373–1378. DOI: 10.4319/lo.1998.43.6.1373.
- Bettarel, Y.; Kan, J.; Wang, K.; Williamson, K. E.; Cooney, S.; Ribblett, S. et al. (2005): Isolation and preliminary characterisation of a small nuclear inclusion virus infecting the diatom *Chaetoceros cf. gracilis*. In *Aquat. Microb. Ecol.* 40 (2), pp. 103–114. DOI: 10.3354/ame040103.
- Bianchi, Thomas S.; Cui, Xingqian; Blair, Neal E.; Burdige, David J.; Eglinton, Timothy I.; Galy, Valier (2018): Centers of organic carbon burial and oxidation at the land-ocean interface. In *Organic Geochemistry* 115, pp. 138–155. DOI: 10.1016/j.orggeochem.2017.09.008.
- Bremner, J.; Rogers, S. I.; Frid, C. L.J. (2003): Assessing functional diversity in marine benthic ecosystems: a comparison of approaches. In *Marine Ecology Progress Series* 254, pp. 11–25. DOI: 10.3354/meps254011.
- Britton, J. C.; Morton, B. (1994): Marine carrion and scavengers. In *Oceanography and Marine Biology: An Annual Review*. Available online at <http://www.vliz.be/en/imis?refid=79583>.
- Broman, Elias; Brösing, Martin; Dopson, Mark; Hylander, Samuel (2015): Oxygenation of anoxic sediments triggers hatching of zooplankton eggs. In *Proceedings. Biological sciences* 282 (1817), p. 20152025. DOI: 10.1098/rspb.2015.2025.
- Brown, E. J.; Button, D. K.; Lang, D. S. (1981): Competition between heterotrophic and autotrophic microplankton for dissolved nutrients. In *Microb Ecol* 7 (3), pp. 199–206. DOI: 10.1007/BF02010303.
- Brussaard, Corina P. D. (2004): Optimization of procedures for counting viruses by flow cytometry. In *Applied and environmental microbiology* 70 (3), pp. 1506–1513. DOI: 10.1128/AEM.70.3.1506-1513.2004.
- Brylinsky, M. (1977): Release of dissolved organic matter by some marine macrophytes. In *Mar. Biol.* 39 (3), pp. 213–220. DOI: 10.1007/BF00390995.
- BUTLER, V. L. (1994): Fish feeding behaviour and fish capture: the case for variation in Lapita fishing strategies. In *Archaeology in Oceania* 29 (2), pp. 81–90. DOI: 10.1002/arco.1994.29.2.81.
- Butman, Cheryl Ann; Carlton, James T.; Palumbi, Stephen R. (1995): Whaling Effects on Deep-Sea Biodiversity. In *Conservation Biology* 9 (2), pp. 462–464. DOI: 10.1046/j.1523-1739.1995.9020462.x.
- Calvert, S. E.; Bustin, R. M.; Ingall, E. D. (1996): Influence of water column anoxia and sediment supply on the burial and preservation of organic carbon in marine shales. In *Geochimica et Cosmochimica Acta* 60 (9), pp. 1577–1593. DOI: 10.1016/0016-7037(96)00041-5.

- Carlson, Craig A.; Hansell, Dennis A. (2015): DOM Sources, Sinks, Reactivity, and Budgets. In *Biogeochemistry of Marine Dissolved Organic Matter*, pp. 65–126. DOI: 10.1016/B978-0-12-405940-5.00003-0.
- Carman, Rolf; Cederwall, Hans (2001): Sediments and Macrofauna in the Baltic Sea — Characteristics, Nutrient Contents and Distribution. In Fredrik V. Wulff, Lars A. Rahm, Per Larsson (Eds.): *A Systems Analysis of the Baltic Sea*, vol. 148. Berlin, Heidelberg: Springer-Verlag Berlin Heidelberg GmbH (Ecological Studies-Analysis and Synthesis, 148), pp. 289–327.
- Casini, M.; Cardinale, M.; Arrhenius, F. (2004): Feeding preferences of herring (*Clupea harengus*) and sprat (*Sprattus sprattus*) in the southern Baltic Sea. In *ICES J Mar Sci* 61 (8), pp. 1267–1277. DOI: 10.1016/j.icesjms.2003.12.011.
- Catalán, Núria; Obrador, Biel; Felip, Marisol; Pretus, Joan Ll. (2013): Higher reactivity of allochthonous vs. autochthonous DOC sources in a shallow lake. In *Aquat Sci* 75 (4), pp. 581–593. DOI: 10.1007/s00027-013-0302-y.
- Cisewski, Boris; Strass, Volker H.; Rhein, Monika; Krägefsky, Sören (2010): Seasonal variation of diel vertical migration of zooplankton from ADCP backscatter time series data in the Lazarev Sea, Antarctica. In *Deep Sea Research Part I: Oceanographic Research Papers* 57 (1), pp. 78–94. DOI: 10.1016/j.dsr.2009.10.005.
- Denman, K. L. (1973): A Time-Dependent Model of the Upper Ocean. In *J. Phys. Oceanogr.* 3 (2), pp. 173–184. DOI: 10.1175/1520-0485(1973)003<0173:ATDMOT>2.0.CO;2.
- Depestele, Jochen; Feekings, Jordan; Reid, David G.; Cook, Robin; Gascuel, Didier; Girardin, Raphael et al. (2019): The Impact of Fisheries Discards on Scavengers in the Sea. In Uhlmann (Ed.): *European Landing Obligation*. 1st ed. [Place of publication not identified]: Springer International Publishing, pp. 129–162.
- DeVries, T.; Primeau, F. (2009): Atmospheric p CO<sub>2</sub> sensitivity to the solubility pump: Role of the low-latitude ocean. In *Global Biogeochem. Cycles* 23 (4), n/a-n/a. DOI: 10.1029/2009GB003537.
- Dilling, Lisa; Alldredge, Alice L. (2000): Fragmentation of marine snow by swimming macrozooplankton: A new process impacting carbon cycling in the sea. In *Deep Sea Research Part I: Oceanographic Research Papers* 47 (7), pp. 1227–1245. DOI: 10.1016/S0967-0637(99)00105-3.
- Duarte, Carlos M.; Cebrián, Just (1996): The fate of marine autotrophic production. In *Limnol Oceanogr* 41 (8), pp. 1758–1766. DOI: 10.4319/lo.1996.41.8.1758.
- Ducklow, H. W. (1992): Factors regulating bottom-up control of bacteria biomass in open ocean plankton communities. In *Arch. Hydrobiol. Beih. Ergebn. Limnol* 37, pp. 207–217.
- ELGAR, M. A.; Crespi, B. J. (1994): Cannibalism. Ecology and evolution among diverse taxa. In *Journal of Evolutionary Biology* 7 (1), pp. 121–123.
- Ellegaard, Marianne; Ribeiro, Sofia (2018): The long-term persistence of phytoplankton resting stages in aquatic 'seed banks'. In *Biological Reviews* 93 (1), pp. 166–183. DOI: 10.1111/brv.12338.
- Estapa, Margaret L.; Mayer, Lawrence M. (2010): Photooxidation of particulate organic matter, carbon/oxygen stoichiometry, and related photoreactions. In *Marine Chemistry* 122 (1–4), pp. 138–147. DOI: 10.1016/j.marchem.2010.06.003.
- Geller, Walter; Müller, Helga (1981): The filtration apparatus of Cladocera: Filter mesh-sizes and their implications on food selectivity. In *Oecologia* 49 (3), pp. 316–321. DOI: 10.1007/bf00347591.
- Gerking, Shelby D. (2014): *Feeding Ecology of Fish*: Elsevier Science.
- Gliwicz, Maciej Z. (1986): Predation and the evolution of vertical migration in zooplankton. In *Nature* 320 (6064), pp. 746–748. DOI: 10.1038/320746a0.
- Hansell, Dennis A.; Carlson, Craig A.; Schlitzer, Reiner (2012): Net removal of major marine dissolved organic carbon fractions in the subsurface ocean. In *Global Biogeochem. Cycles* 26 (1), n/a-n/a. DOI: 10.1029/2011GB004069.
- Hewitt, David A.; Hoenig, John M. (2005): Comparison of two approaches for estimating natural mortality based on longevity. In *Fishery Bulletin* 103 (2), p. 433.
- Iversen, M. H.; Poulsen, L. K. (2007): Coprophagy, coprophagy, and coprochaly in the copepods *Calanus helgolandicus*, *Pseudocalanus elongatus*, and *Oithona similis*. In *Marine Ecology Progress Series* 350, pp. 79–89. DOI: 10.3354/meps07095.
- Jakuszeit, Theresa; Lindsey-Jones, James; Peaudecerf, François J.; Croze, Ottavio A. (2021): Migration and accumulation of bacteria with chemotaxis and chemokinesis. In *Eur. Phys. J. E* 44 (3), p. 32. DOI: 10.1140/epje/s10189-021-00009-w.
- Katija, Kakani (2012): Biogenic inputs to ocean mixing. In *J Exp Biol* 215 (Pt 6), pp. 1040–1049. DOI: 10.1242/jeb.059279.
- Keil, Richard G.; Montluçon, Daniel B.; Prahl, Fredrick G.; Hedges, John I. (1994): Sorptive preservation of labile organic matter in marine sediments. In *Nature* 370 (6490), pp. 549–552. DOI: 10.1038/370549a0.
- Keller, Michael; Stallard, Robert F. (1994): Methane emission by bubbling from Gatun Lake, Panama. In *J. Geophys. Res.* 99 (D4), p. 8307. DOI: 10.1029/92JD02170.
- Kerner, Martin; Hohenberg, Heinz; Ertl, Siegmund; Reckermann, Marcus; Spitz, Alejandro (2003): Self-organization of dissolved organic matter to micelle-like microparticles in river water. In *Nature* 422 (6928), pp. 150–154. DOI: 10.1038/nature01469.

- Kiljunen, Mikko; Peltonen, Heikki; Lehtiniemi, Maiju; Uusitalo, Laura; Sinisalo, Tuula; Norkko, Joanna et al. (2020): Benthic-pelagic coupling and trophic relationships in northern Baltic Sea food webs. In *Limnology and Oceanography* 65 (8), pp. 1706–1722. DOI: 10.1002/lno.11413.
- Kjørboe, T. (2016): Foraging mode and prey size spectra of suspension-feeding copepods and other zooplankton. In *Marine Ecology Progress Series* 558, pp. 15–20. DOI: 10.3354/meps11877.
- Kourtidis, K.; Kioutsoukis, I.; McGinnis, D. F.; Rapsomanikis, S. (2006): Effects of methane outgassing on the Black Sea atmosphere. In *Atmos. Chem. Phys.* 6 (12), pp. 5173–5182. DOI: 10.5194/acp-6-5173-2006.
- Koziorowska, Katarzyna; Kuliński, Karol; Pempkowiak, Janusz (2018): Comparison of the burial rate estimation methods of organic and inorganic carbon and quantification of carbon burial in two high Arctic fjords. In *Oceanologia* 60 (3), pp. 405–418. DOI: 10.1016/j.oceano.2018.02.005.
- La Rocha, Christina L. de; Passow, Uta (2007): Factors influencing the sinking of POC and the efficiency of the biological carbon pump. In *Deep Sea Research Part II: Topical Studies in Oceanography* 54 (5-7), pp. 639–658. DOI: 10.1016/j.dsr2.2007.01.004.
- Larsson, U.; Hagström, Å. (1982): Fractionated phytoplankton primary production, exudate release and bacterial production in a Baltic eutrophication gradient. In *Marine Biology* 67 (1), pp. 57–70. DOI: 10.1007/BF00397095.
- Le Mézo, Priscilla K.; Galbraith, Eric D. (2021): The fecal iron pump: Global impact of animals on the iron stoichiometry of marine sinking particles. In *Limnol Oceanogr* 66 (1), pp. 201–213. DOI: 10.1002/lno.11597.
- Lenhart, Katharina; Klitzsch, Thomas; Langer, Gerald; Nehrke, Gernot; Bunge, Michael; Schnell, Sylvia; Keppler, Frank (2016): Evidence for methane production by the marine algae *Emiliania huxleyi*. In *Biogeosciences* 13 (10), pp. 3163–3174. DOI: 10.5194/bg-13-3163-2016.
- López-Sandoval, D. C.; Rodríguez-Ramos, T.; Cermeño, P.; Marañón, E. (2013): Exudation of organic carbon by marine phytoplankton: dependence on taxon and cell size. In *Mar. Ecol. Prog. Ser.* 477, pp. 53–60. DOI: 10.3354/meps10174.
- Marshall, Christopher D.; Goldbogen, Jeremy A. (2015): Feeding mechanisms. In *Marine mammal physiology: requisites for ocean living*, pp. 95–118.
- Meier, M. E.; Chin, Y. P. (Eds.) (1998): Sorption and fractionation behavior of natural organic matter (NOM) in surface and ground water samples from a small, well-characterized watershed. ABSTRACTS OF PAPERS OF THE AMERICAN CHEMICAL SOCIETY: AMER CHEMICAL SOC 1155 16TH ST, NW, WASHINGTON, DC 20036 USA.
- Mentges, A.; Feenders, C.; Deutsch, C.; Blasius, B.; Dittmar, T. (2019): Long-term stability of marine dissolved organic carbon emerges from a neutral network of compounds and microbes. In *Sci Rep* 9 (1), p. 17780. DOI: 10.1038/s41598-019-54290-z.
- Milledge, John; Harvey, Patricia (2016): Golden Tides: Problem or Golden Opportunity? The Valorisation of Sargassum from Beach Inundations. In *JMSE* 4 (3), p. 60. DOI: 10.3390/jmse4030060.
- Møller, E. F.; Nielsen, T. G.; (None) (2001): Production of Bacterial Substrate by Marine Copepods: Effect of Phytoplankton Biomass and Cell Size. In *J Plankton Res* 23 (5), pp. 527–536. DOI: 10.1093/plankt/23.5.527.
- Møller, E. F.; Thor, P.; Nielsen, T. G. (2003): Production of DOC by *Calanus finmarchicus*, *C. glacialis* and *C. hyperboreus* through sloppy feeding and leakage from fecal pellets. In *Marine Ecology Progress Series* 262, pp. 185–191. DOI: 10.3354/meps262185.
- Neilson, J. D.; Perry, R. I. (1990): Diel Vertical Migrations of Marine Fishes: an Obligate or Facultative Process? In *Advances in Marine Biology* 26, pp. 115–168. DOI: 10.1016/S0065-2881(08)60200-X.
- Officer, C. B.; Smayda, T. J.; Mann, R. (1982): Benthic Filter Feeding: A Natural Eutrophication Control. In *Marine Ecology Progress Series* 9, pp. 203–210. DOI: 10.3354/meps009203.
- Omori, M.; Hamner, W. M. (1982): Patchy distribution of zooplankton: Behavior, population assessment and sampling problems. In *Marine Biology* 72 (2), pp. 193–200. DOI: 10.1007/BF00396920.
- Paffenhöfer, G. A.; Knowles, Sally C. (1979): Ecological implications of fecal pellet size, production and consumption by copepods. In *J. mar. Res* 37 (1), pp. 35–49.
- Parr, Thomas B.; Inamdar, Shreeram P.; Miller, Matthew J. (2019): Overlapping anthropogenic effects on hydrologic and seasonal trends in DOC in a surface water dependent water utility. In *Water Research* 148, pp. 407–415. DOI: 10.1016/j.watres.2018.10.065.
- Pechenik, J. A. (1999): On the advantages and disadvantages of larval stages in benthic marine invertebrate life cycles. In *Marine Ecology Progress Series* 177, pp. 269–297. DOI: 10.3354/meps177269.
- Ribes, M.; Coma, R.; Gili, J. M. (1999): Natural diet and grazing rate of the temperate sponge *Dysidea avara* (Demospongiae, Dendroceratida) throughout an annual cycle. In *Marine Ecology Progress Series* 176, pp. 179–190. DOI: 10.3354/meps176179.
- Roman, Joe; McCarthy, James J. (2010): The whale pump: marine mammals enhance primary productivity in a coastal basin. In *PLOS ONE* 5 (10), e13255. DOI: 10.1371/journal.pone.0013255.

- Saba, Grace K.; Burd, Adrian B.; Dunne, John P.; Hernández-León, Santiago; Martin, Angela H.; Rose, Kenneth A. et al. (2021): Toward a better understanding of fish-based contribution to ocean carbon flux. In *Limnol Oceanogr* 66 (5), pp. 1639–1664. DOI: 10.1002/lno.11709.
- Saba, V. S.; Friedrichs, M. A. M.; Antoine, D.; Armstrong, R. A.; Asanuma, I.; Behrenfeld, M. J. et al. (2011): An evaluation of ocean color model estimates of marine primary productivity in coastal and pelagic regions across the globe. In *Biogeosciences* 8 (2), pp. 489–503. DOI: 10.5194/bg-8-489-2011.
- Sahrhage, Dietrich; Lundbeck, Johannes (2012): A History of Fishing: Springer Science & Business Media.
- Sailley, Séverine F.; Polimene, Luca; Mitra, Aditee; Atkinson, Angus; Allen, J. Icarus (2015): Impact of zooplankton food selectivity on plankton dynamics and nutrient cycling. In *J Plankton Res* 37 (3), pp. 519–529. DOI: 10.1093/plankt/fbv020.
- Schlacher, Thomas A.; Strydom, Simone; Connolly, Rod M.; Schoeman, David (2013): Donor-Control of Scavenging Food Webs at the Land-Ocean Interface. In *PLOS ONE* 8 (6), e68221. DOI: 10.1371/journal.pone.0068221.
- Schmale, Oliver; Wäge, Janine; Mohrholz, Volker; Wasmund, Norbert; Gräwe, Ulf; Rehder, Gregor et al. (2018): The contribution of zooplankton to methane supersaturation in the oxygenated upper waters of the central Baltic Sea. In *Limnol Oceanogr* 63 (1), pp. 412–430. DOI: 10.1002/lno.10640.
- Shen, Yuan; Benner, Ronald (2018): Mixing it up in the ocean carbon cycle and the removal of refractory dissolved organic carbon. In *Sci Rep* 8 (1), p. 2542. DOI: 10.1038/s41598-018-20857-5.
- Skilleter, G. A.; Wegscheidl, C.; Lanyon, J. M. (2007): Effects of grazing by a marine mega-herbivore on benthic assemblages in a subtropical seagrass bed. In *Marine Ecology Progress Series* 351, pp. 287–300. DOI: 10.3354/meps07174.
- Smith, David C.; Simon, Meinhard; Alldredge, Alice L.; Azam, Farooq (1992): Intense hydrolytic enzyme activity on marine aggregates and implications for rapid particle dissolution. In *Nature* 359 (6391), pp. 139–142. DOI: 10.1038/359139a0.
- Steinberg, Deborah K.; Landry, Michael R. (2017): Zooplankton and the Ocean Carbon Cycle. In *Annual review of marine science* 9, pp. 413–444. DOI: 10.1146/annurev-marine-010814-015924.
- Sun, Xiaole; Turchyn, Alexandra V. (2014): Significant contribution of authigenic carbonate to marine carbon burial. In *Nature Geosci* 7 (3), pp. 201–204. DOI: 10.1038/ngeo2070.
- Tucker, James P.; Santos, Isaac R.; Davis, Kay L.; Butcher, Paul A. (2019): Whale carcass leachate plumes in beach groundwater: A potential shark attractant to the surf? In *Marine pollution bulletin* 140, pp. 219–226. DOI: 10.1016/j.marpolbul.2019.01.043.
- Turker, Hakan (2004): Clearance Rates Of Suspended Particulate Organic Carbon By Nile Tilapia With A Dual Pattern Of Filter Feeding. In *0792-156X*. Available online at <https://evols.library.manoa.hawaii.edu/handle/10524/19099>.
- Wainright, S. C.; Hopkinson, C. S. (1997): Effects of sediment resuspension on organic matter processing in coastal environments: A simulation model. In *Journal of Marine Systems* 11 (3-4), pp. 353–368. DOI: 10.1016/S0924-7963(96)00130-3.
- Wallmann, Klaus; Pinero, Elena; Burwicz, Ewa; Haeckel, Matthias; Hensen, Christian; Dale, Andrew; Ruepke, Lars (2012): The Global Inventory of Methane Hydrate in Marine Sediments: A Theoretical Approach. In *Energies* 5 (7), pp. 2449–2498. DOI: 10.3390/en5072449.
- Wear, Stephanie L.; Thurber, Rebecca Vega (2015): Sewage pollution: mitigation is key for coral reef stewardship. In *Annals of the New York Academy of Sciences* 1355. Available online at <https://ir.library.oregonstate.edu/concern/articles/8910jz63t>.
- Williams, T. M.; Davis, R. W.; Fuiman, L. A.; Francis, J.; Le Boeuf, B. J.; Horning, M. et al. (2000): Sink or swim: strategies for cost-efficient diving by marine mammals. In *Science* 288 (5463), pp. 133–136. DOI: 10.1126/science.288.5463.133.
- Wilmers, Christopher C.; Estes, James A.; Edwards, Matthew; Laidre, Kristin L.; Konar, Brenda (2012): Do trophic cascades affect the storage and flux of atmospheric carbon? An analysis of sea otters and kelp forests. In *Frontiers in Ecology and the Environment* 10 (8), pp. 409–415. DOI: 10.1890/110176.
- Young, Colleen; Eguchi, Tomoharu; Ames, Jack A.; Staedler, Michelle; Hatfield, Brian B.; Harris, Mike; Golson-Fisch, Emily A. (2019): Drift and beaching patterns of sea otter carcasses and car tire dummies. In *Mar Mam Sci* 35 (4), pp. 1512–1526. DOI: 10.1111/mms.12609.
- Zehnder, A. J.; Brock, T. D. (1979): Methane formation and methane oxidation by methanogenic bacteria. In *J Bacteriol* 137 (1), pp. 420–432. DOI: 10.1128/jb.137.1.420-432.1979.
- Zijlstra, J. J. (1988): Fish Migrations Between Coastal and Offshore Areas. In : Coastal-Offshore Ecosystem Interactions: Springer, Berlin, Heidelberg, pp. 257–272. Available online at [https://link.springer.com/chapter/10.1007/978-3-642-52452-3\\_12](https://link.springer.com/chapter/10.1007/978-3-642-52452-3_12).
